# Supplementary material for: Dual role for phenylalanine 178 during catalysis by aristolochene synthase
Source: Royal Society of Chemistry journal article supplement (doi:10.1039/b407932a), 2004-01-01
Supplement: b407932a.pdf [file b407932a.pdf]

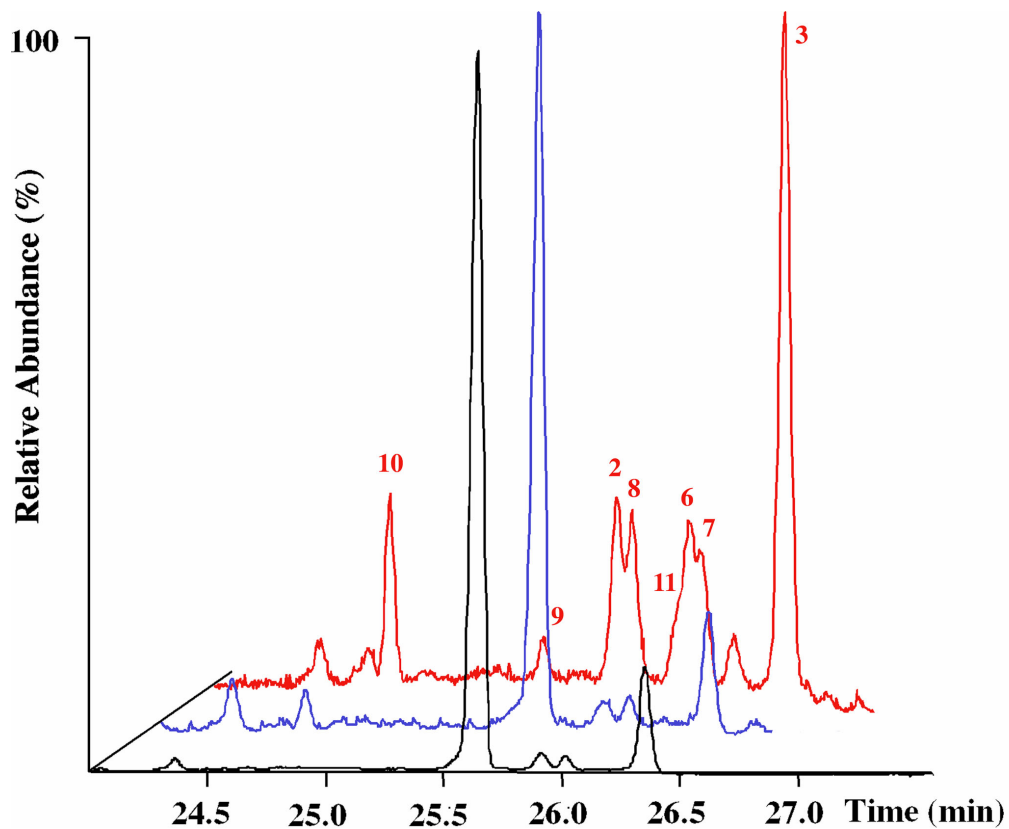

**Figure S1:** Total ion chromatograms of the products obtained from incubations of FPP with AS (black), ASF178Y (blue), and ASF178V (red). Products are labelled as in the main text.

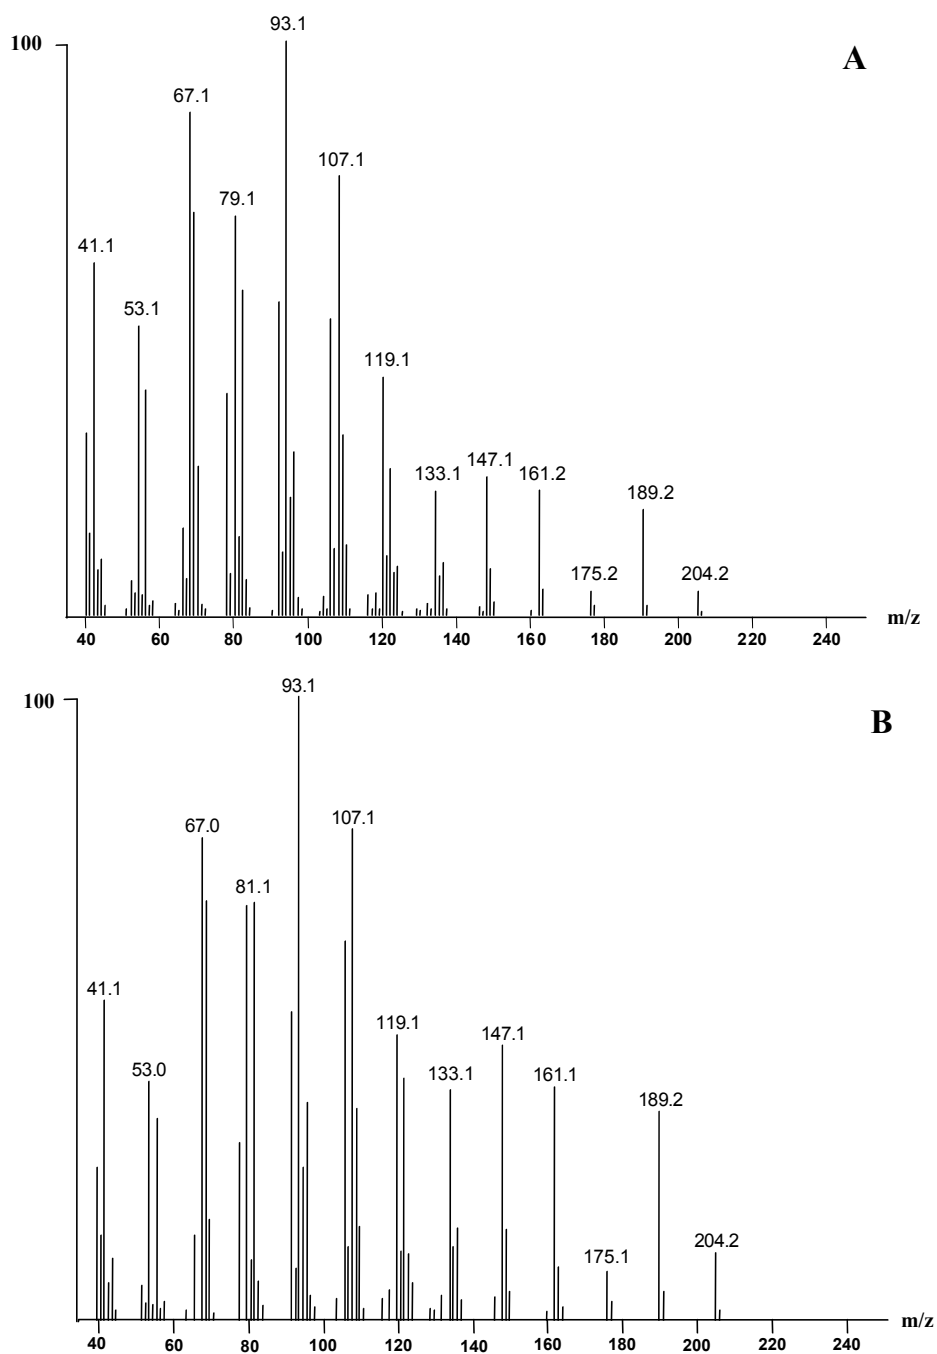

**Figure S2:** Mass spectra of product **3** from ASF178 catalysis (A) and of authentic germacrene A (B).

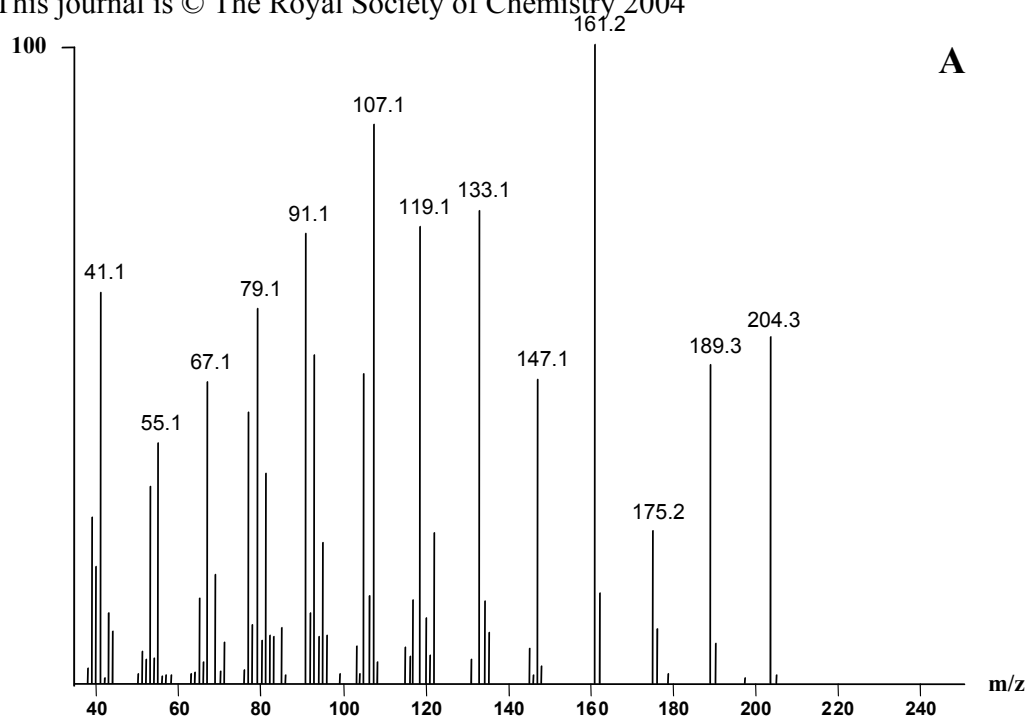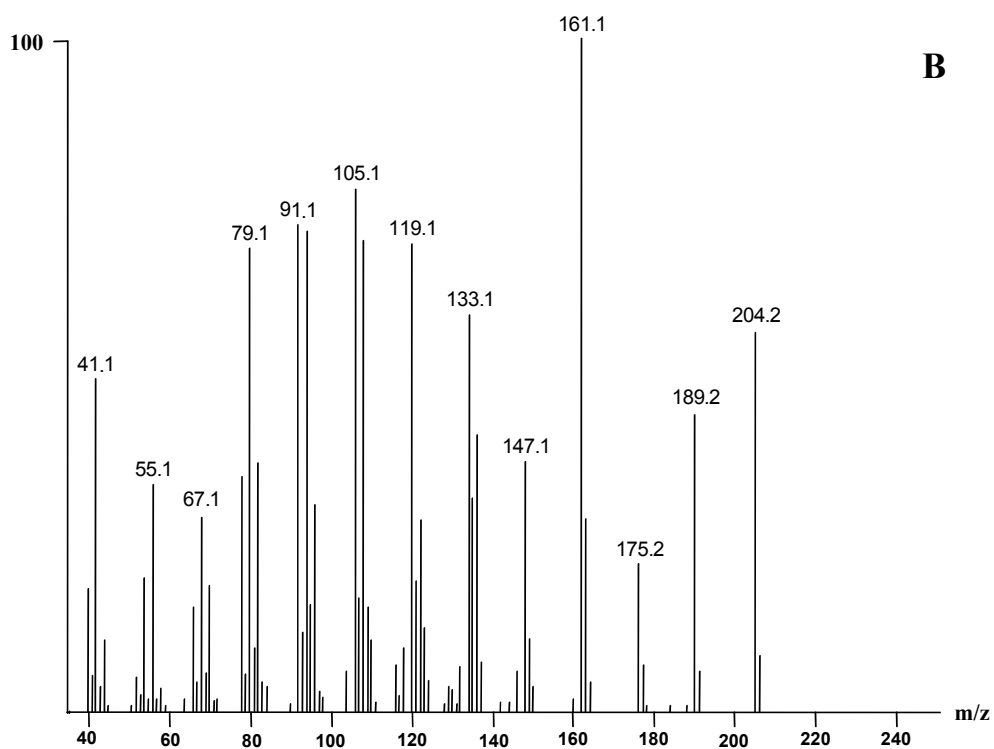

**Figure S3:** Mass spectra of product **6** from ASF178 catalysis (A) and of authentic valencene (B).

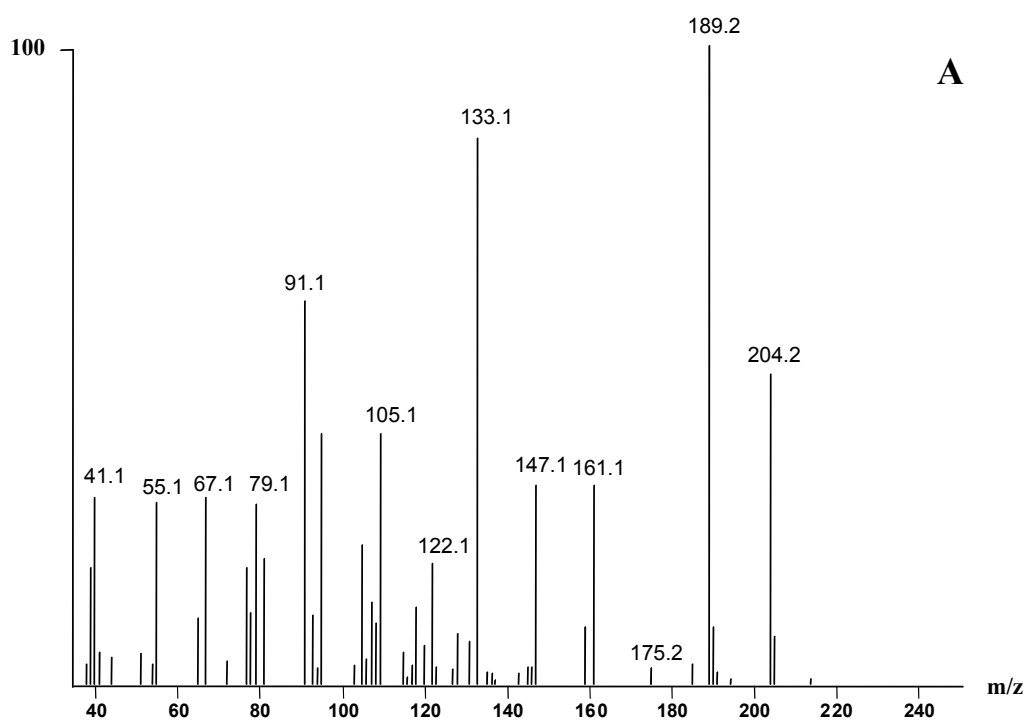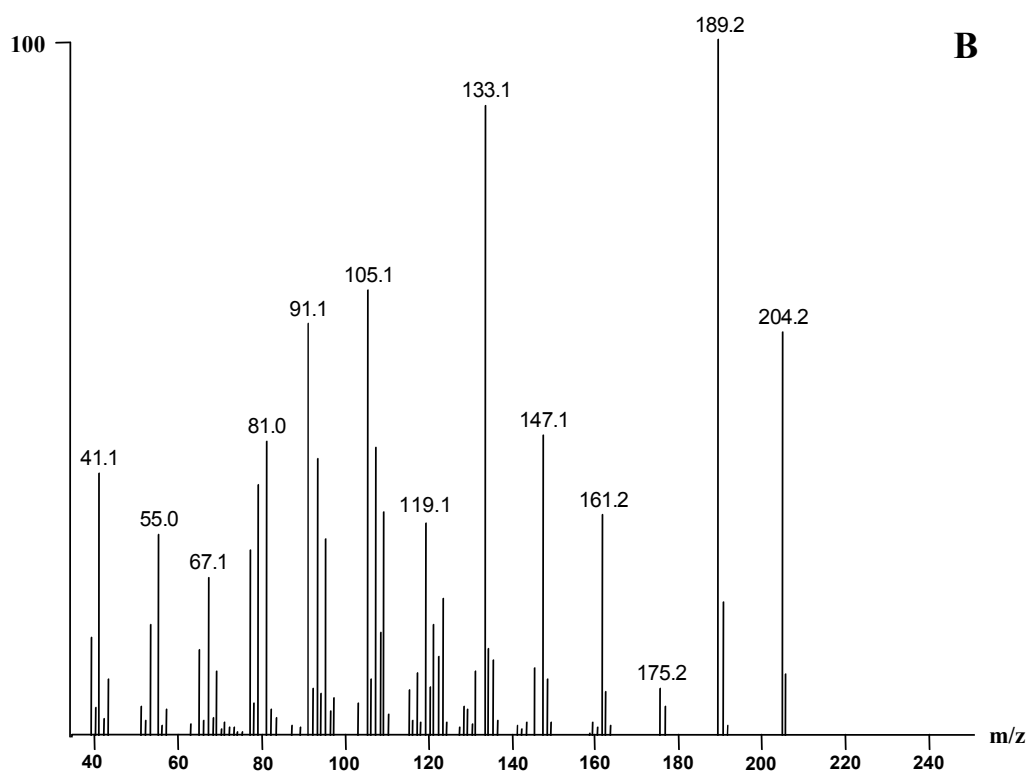

**Figure S4:** Mass spectra of product **7** from ASF178 catalysis (A) and of authentic  $\alpha$ -selinene (B).

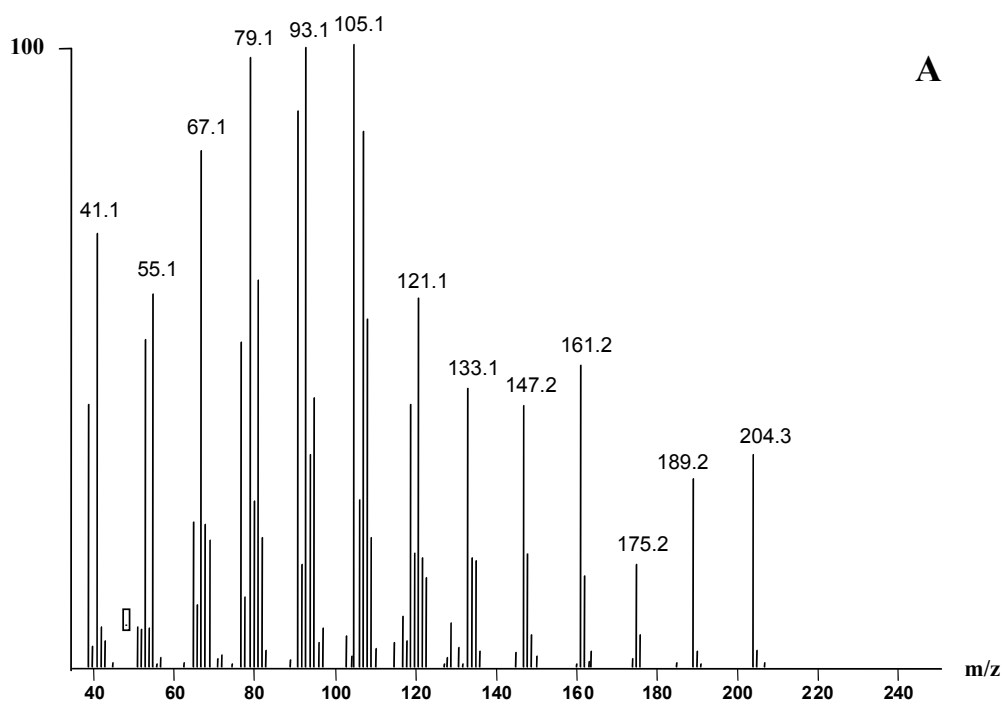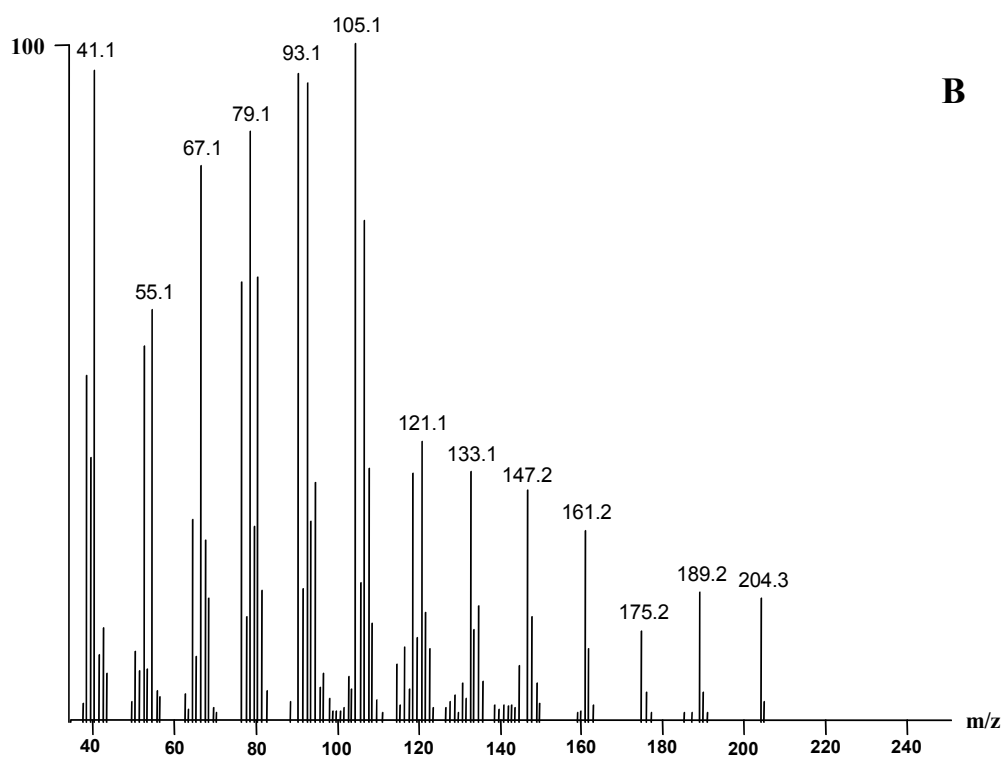

**Figure S5:** Mass spectra of product **8** from ASF178 catalysis (A) and of authentic  $\beta$ -selinene (B).

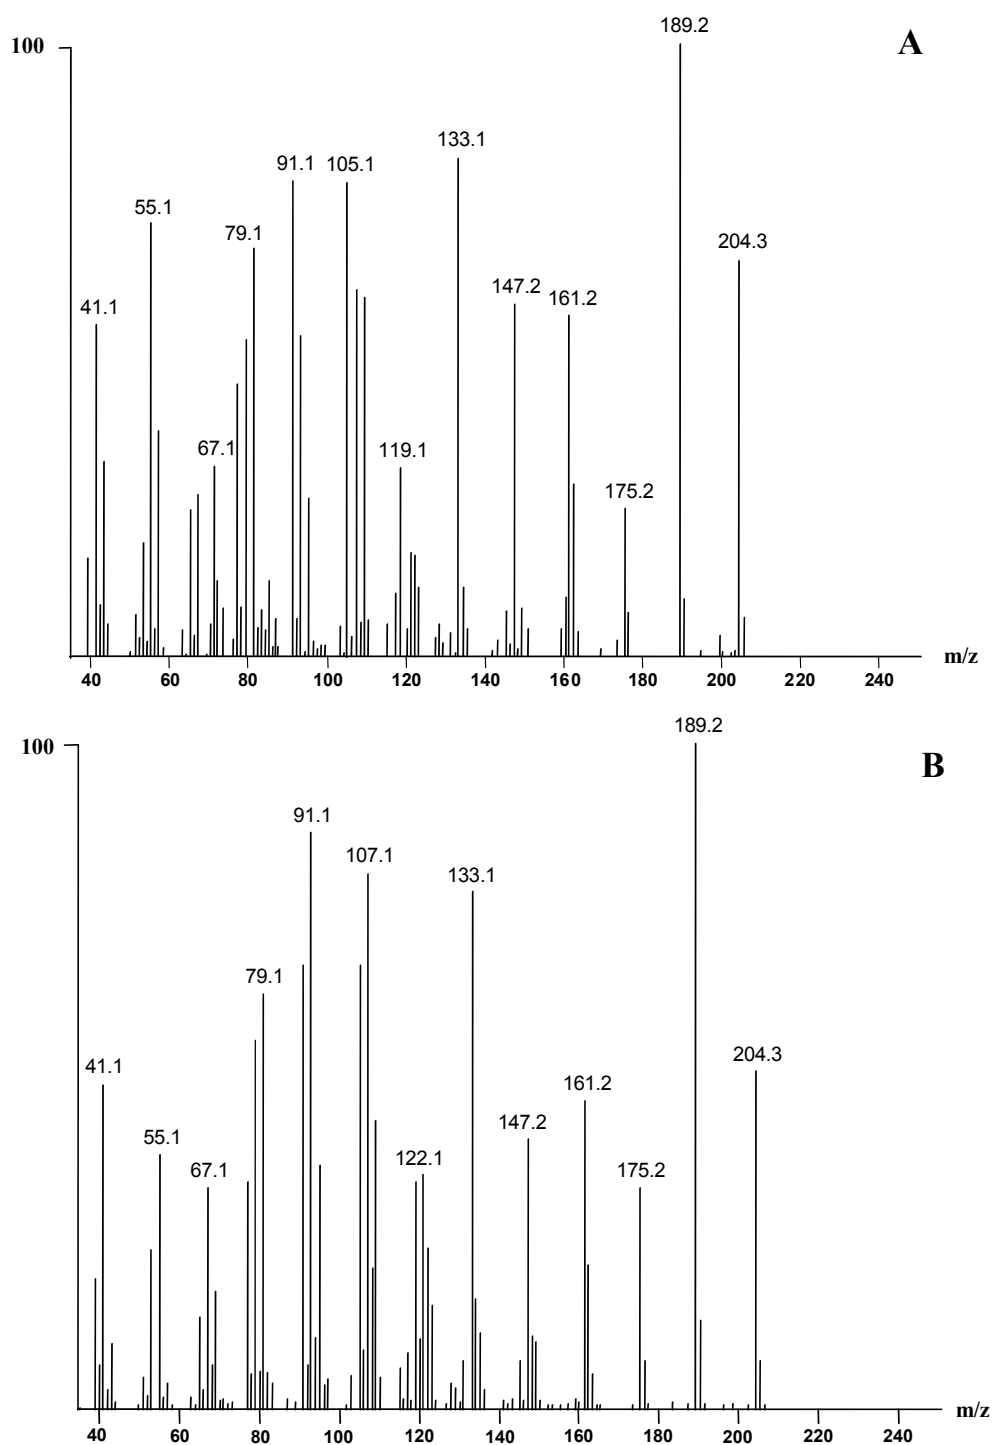

**Figure S6:** Mass spectra of product **9** from ASF178 catalysis (A) and of authentic selina-4,11-diene (B).

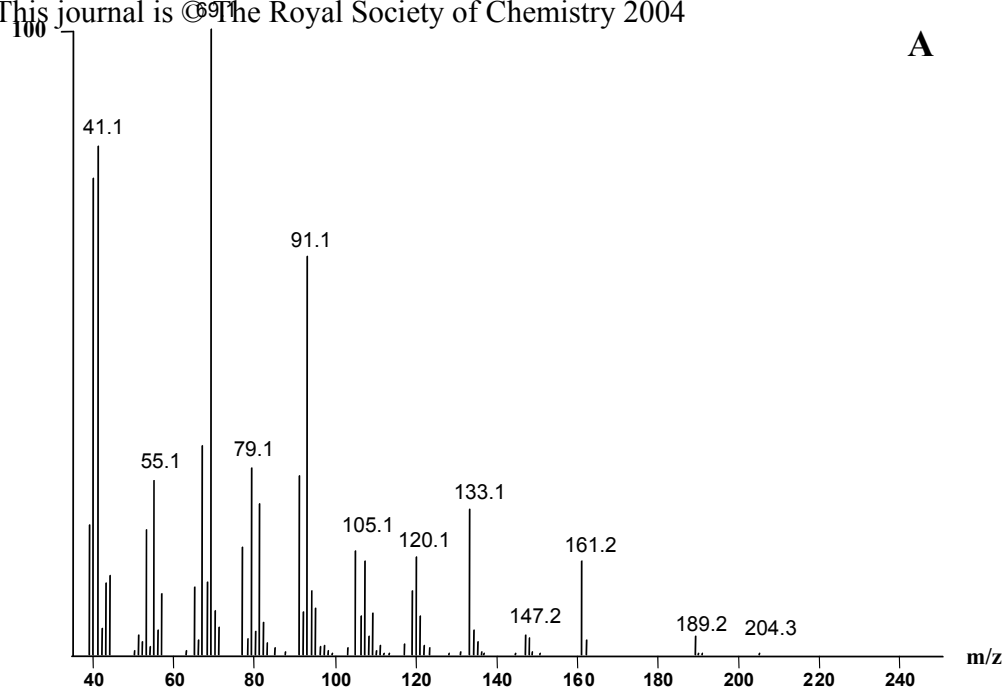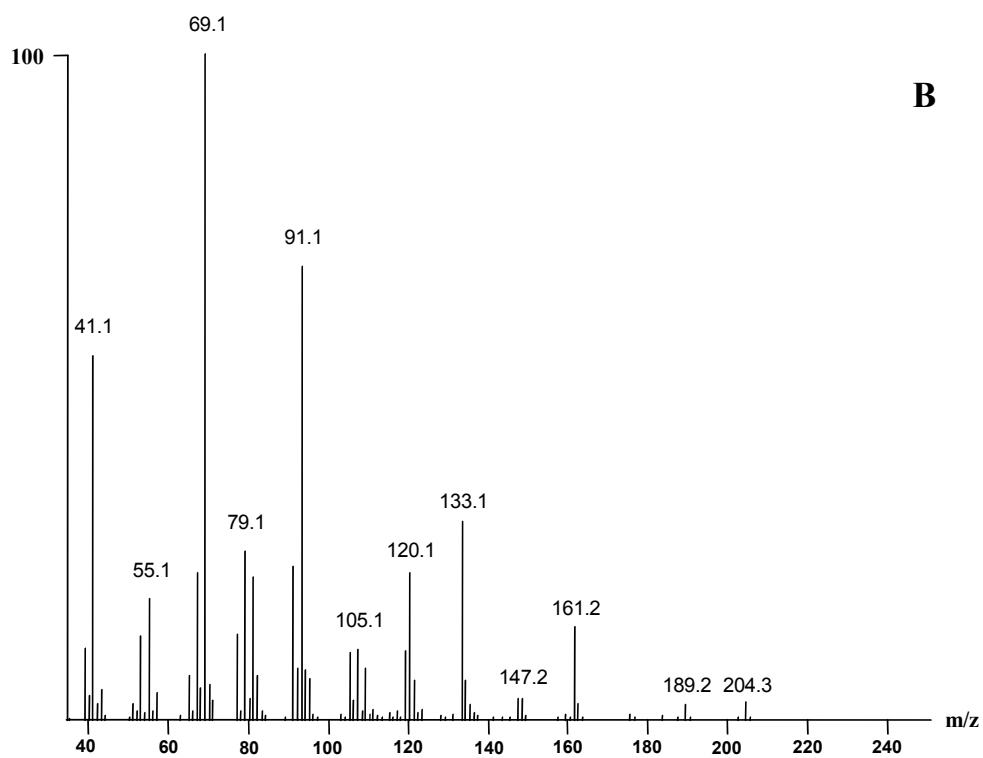

**Figure S7:** Mass spectra of product **10** from ASF178 catalysis (A) and of authentic (E)- $\beta$ -farnesene (B).

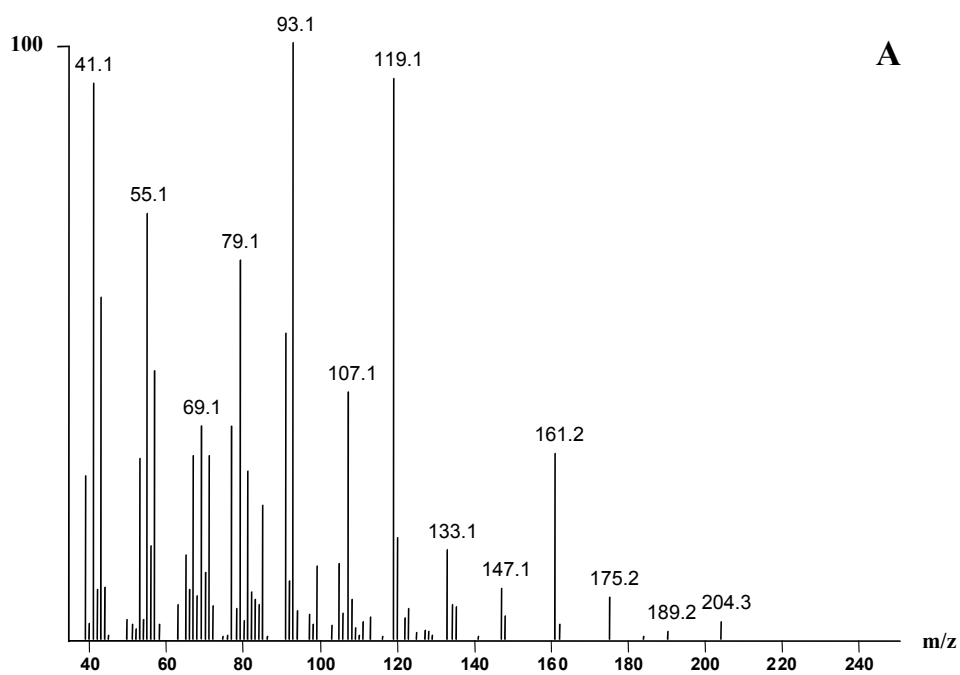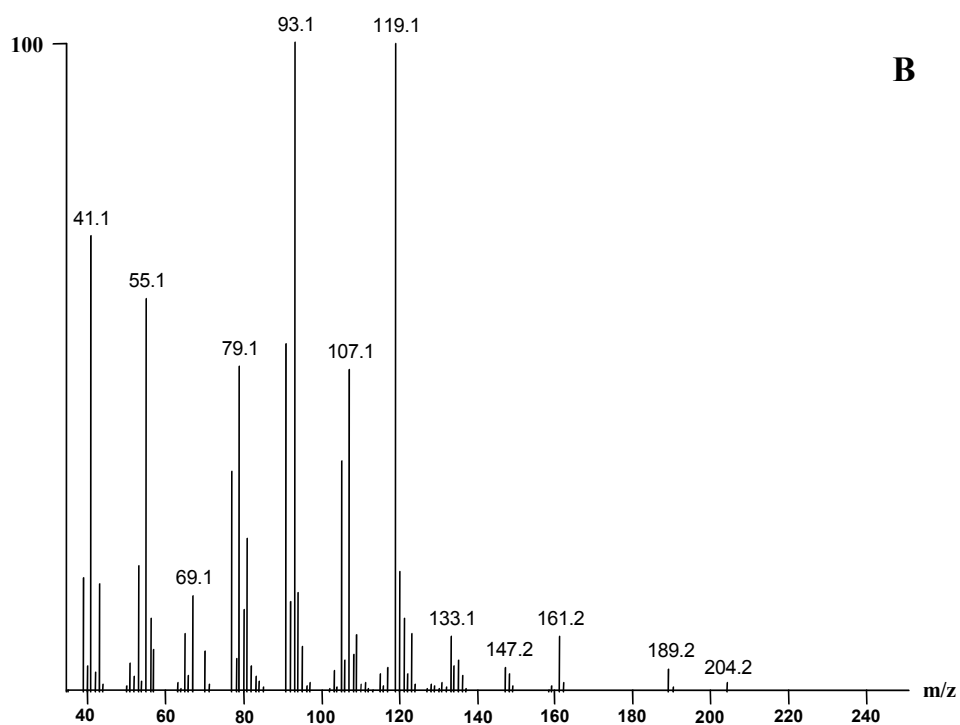

**Figure S8:** Mass spectra of product **11** from ASF178 catalysis (A) and of authentic (E,E)- $\alpha$ -farnesene (B).



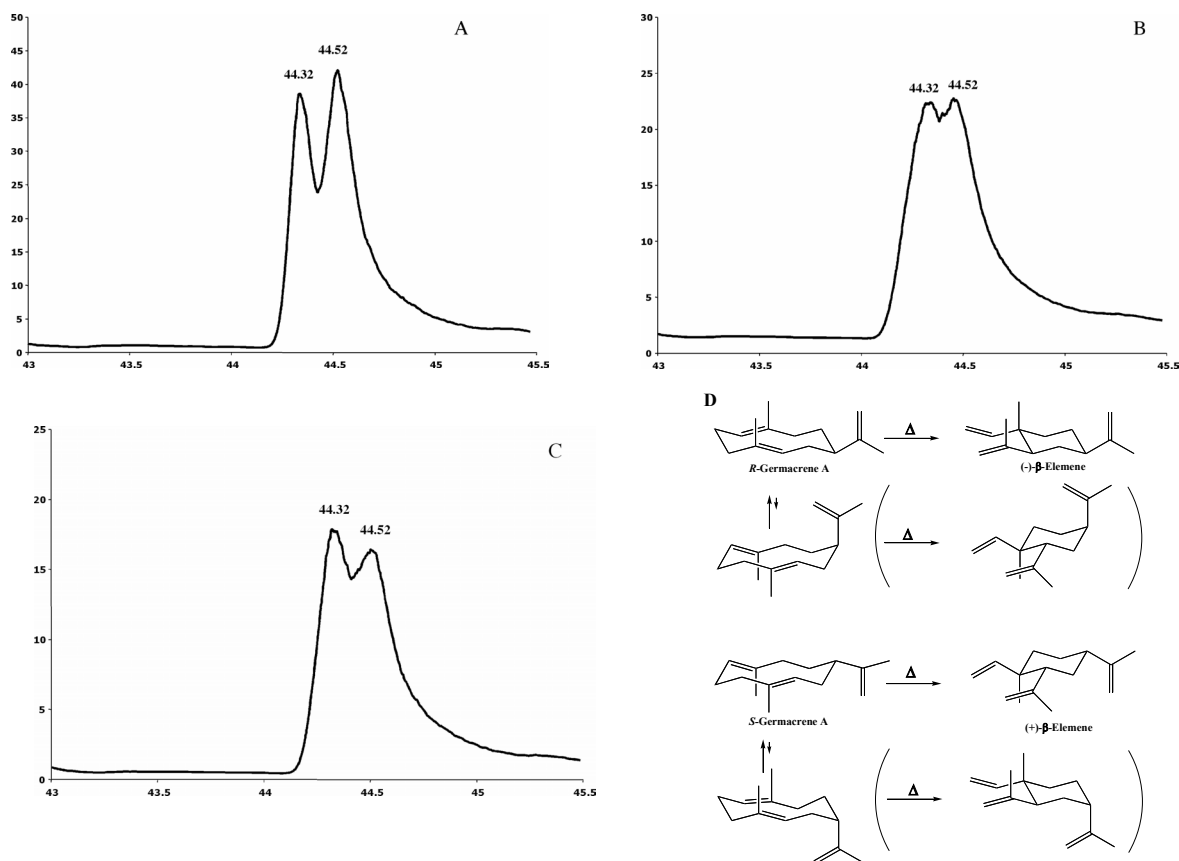

**Figure S9: Determination of the absolute configuration of germacrene A produced by ASF178V.** **A.** GC-trace of a racemic mixture of  $\beta$ -elemenes. **B.** GC-trace of a co-injection of racemic  $\beta$ -elemenes and the  $\beta$ -elemene produced from FPP by ASF178V. **C.** GC-trace of a co-injection of racemic  $\beta$ -elemenes and (+)- $\beta$ -elemene produced from (*S*)-germacrene A. (*S*)-germacrene A was generated using wild type AS. **D.** Relation of (*R*)- and (*S*)-germacrene A to the  $\beta$ -elemenes formed in Cope rearrangements at increased temperatures. Method: The absolute configuration of germacrene A produced by ASF178V catalysis was determined using a GC equipped with a 30 m (0.25 mm) heptakis (-O-TBDMS-2, 3-di-O-methyl)- $\beta$ -cyclodextrin (50% in OV17) chiral column. The method developed by de Kraaker et al.,<sup>1</sup> was used. Splitless injections

with an injector temperature of 250°C induced the Cope rearrangement of the enzymatically produced germacrene A.<sup>2</sup>

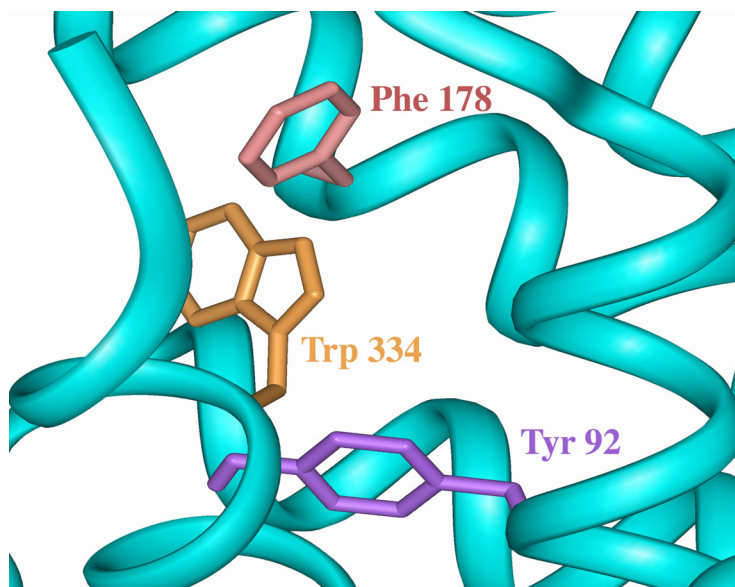

**Figure S10:** Relative orientation of residues Tyr 92, Phe 178, and Trp 334 in the active site of aristolochene synthase. Coordinates are from the X-ray structure of the apo-enzyme (pdb-file:1DI1).<sup>3</sup>

## References

- 1 J.-W. de Kraaker; M. C. R. Franssen; A. de Groot; W. A. König; H. J. Boumeester, *Plant Physiol.*, 1998, 117, 1381-1392 (Ref 14 in the main text).
- 2 M. J. Calvert; P. R. Ashton; R. K. Allemann, *J. Am. Chem. Soc.*, 2002, 124, 11636 (Ref 6 in the main text).
- 3 J. M. Caruthers; I. Kang; M. J. Rynkiewicz; D. E. Cane; D. W. Christianson, *J. Biol. Chem.*, 2000, 275, 25533.
